# Supplementary material for: Integrating SMART Principles in Flood Early Warning System Design in the Himalayas
Source: Copernicus journal article supplement (doi:10.5194/egusphere-2025-2081), 2025-07-10
Supplement: Supplementary file 1 [file egusphere-2025-2081-supplement.pdf]

# Integrating SMART principles in Flood Early Warning System Design in the Himalayas

Author: Sudhanshu Dixit<sup>1</sup>, Sumit Sen<sup>1\*</sup>, Tahmina Yasmin<sup>2</sup>, Kieran Khamis<sup>2</sup>, Debashish Sen<sup>3</sup>, Wouter Buytaert<sup>4</sup>, David M. Hannah<sup>2</sup>

<sup>1</sup>Centre of Excellence in Disaster Mitigation and Management, Indian Institute of Technology Roorkee, Roorkee, Uttarakhand, India

<sup>2</sup>School of Geography, Earth & Environmental Sciences, University of Birmingham, Birmingham, UK

<sup>3</sup>People's Science Institute, Dehradun, India

<sup>4</sup>Department of Civil and Environmental Engineering, Imperial College London, London, UK

\*Correspondence to [sumit.sen@hy.iitr.ac.in](mailto:sumit.sen@hy.iitr.ac.in)

## Supplementary Information (SI)

A snippet of all the heavy and very heavy events provides a concise summary and underscores the importance of a dense sensor network. This table shows variability in the response of the watershed in terms of water level. “-” represents missing data for that event.

|     | Time_stamps | RG1(mm) | RG2(mm) | RG3(mm) | RG4(mm) | Category-RG1 | Category-RG2 | Category-RG3 | Category-RG4 | W11(cm) | W12(cm) | W13(cm) | Category-wl_1         | Category-wl_2 | Category-wl_3 |
|-----|-------------|---------|---------|---------|---------|--------------|--------------|--------------|--------------|---------|---------|---------|-----------------------|---------------|---------------|
| RG1 | 9/1/2022    | 157     | 46.2    | -       | 11.2    | very heavy   | rather heavy | -            | moderate     | 138     | -       | 165     | Advisory              | -             | Advisory      |
|     | 9/25/2022   | 73      | 89      | -       | 92.4    | heavy        | heavy        | -            | heavy        | 155     | -       | 199     | Advisory              | -             | Warning       |
|     | 6/25/2023   | 96.4    | 50.8    | 45.8    | 0.2     | heavy        | rather heavy | rather heavy | very light   | 56      | -       | 73      | Cancellation          | -             | Cancellation  |
|     | 8/17/2023   | 70.4    | 54.6    | -       | 19.6    | heavy        | rather heavy | -            | moderate     | 60      | 125     | 124     | Cancellation          | Advisory      | Cancellation  |
|     | 8/21/2023   | 106.8   | 167.6   | -       | 242.2   | heavy        | very heavy   | -            | very heavy   | -       | 113     | 170     | -                     | Advisory      | Advisory      |
|     | Time_stamps | RG1(mm) | RG2(mm) | RG3(mm) | RG4(mm) | Category-RG1 | Category-RG2 | Category-RG3 | Category-RG4 | W11(cm) | W12(cm) | W13(cm) | Category-wl_1         | Category-wl_2 | Category-wl_3 |
| RG2 | 9/25/2022   | 73      | 89      | 0       | 92.4    | heavy        | heavy        | -            | heavy        | 155     | 18      | 199     | Advisory              | -             | Warning       |
|     | 6/22/2023   | 14.6    | 108.6   | 124.2   | 3.6     | moderate     | heavy        | heavy        | light        | -       | 59      | 136     | -                     | Watch         | Watch         |
|     | 7/17/2023   | 0.4     | 76.8    | 124.2   | 3.2     | very light   | heavy        | heavy        | light        | 105     | 58      | 150     | Watch                 | Watch         | Watch         |
|     | 7/25/2023   | -       | 68      | -       | 49.4    | -            | heavy        | -            | rather heavy | 119     | 110     | 133     | Watch                 | Advisory      | Watch         |
|     | 7/28/2023   | -       | 90.2    | -       | 11.8    | -            | heavy        | -            | moderate     | 102     | 93      | 119     | Watch                 | Advisory      | Cancellation  |
|     | 8/7/2023    | -       | 107.6   | -       | 25.4    | -            | heavy        | -            | moderate     | -       | 212     | 158     | -                     | Warning       | Advisory      |
|     | 8/11/2023   | -       | 68.8    | -       | 33      | -            | heavy        | -            | moderate     | -       | 142     | 110     | -                     | Advisory      | Cancellation  |
|     | 8/14/2023   | 3.8     | 170.4   | -       | 165.8   | light        | very heavy   | -            | very heavy   | -       | 147     | 172     | -                     | Advisory      | Advisory      |
|     | 8/18/2023   | 53.6    | 66.2    | -       | 78      | rather heavy | heavy        | -            | heavy        | -       | 92      | 123     | -                     | Advisory      | Cancellation  |
|     | 8/21/2023   | 106.8   | 167.6   | -       | 242.2   | heavy        | very heavy   | -            | very heavy   | -       | 113     | 170     | -                     | Advisory      | Advisory      |
|     | Time_stamps | RG1(mm) | RG2(mm) | RG3(mm) | RG4(mm) | Category-RG1 | Category-RG2 | Category-RG3 | Category-RG4 | W11(cm) | W12(cm) | W13(cm) | Category-wl_1         | Category-wl_2 | Category-wl_3 |
| RG3 | 6/22/2023   | 14.6    | 108.6   | 124.2   | 3.6     | moderate     | heavy        | heavy        | light        | -       | 59      | 136     | -                     | Watch         | Watch         |
|     | 7/4/2023    | 3       | 27      | 66      | 59.2    | light        | moderate     | heavy        | rather heavy | 68      | 113     | 116     | Cancellation          | Advisory      | Cancellation  |
|     | 7/17/2023   | 0.4     | 76.8    | 124.2   | 3.2     | very light   | heavy        | heavy        | light        | 105     | 58      | 150     | Watch                 | Watch         | Watch         |
|     | Time_stamps | RG1(mm) | RG2(mm) | RG3(mm) | RG4(mm) | Category-RG1 | Category-RG2 | Category-RG3 | Category-RG4 | W11(cm) | W12(cm) | W13(cm) | Category-wl_1         | Category-wl_2 | Category-wl_3 |
| RG4 | 9/4/2022    | 18.4    | 56.8    | -       | 89.6    | moderate     | rather heavy | -            | heavy        | 132     | -       | 167     | Watch                 | -             | Advisory      |
|     | 9/25/2022   | 73      | 89      | -       | 92.4    | heavy        | heavy        | -            | heavy        | 155     | -       | 199     | Advisory              | -             | Warning       |
|     | 7/9/2023    | 1.4     | 57.2    | 63.6    | 74.8    | very light   | rather heavy | rather heavy | heavy        | 83      | -       | 80      | Information Statement | -             | Cancellation  |
|     | 7/12/2023   | 1       | 53.6    | 55      | 68.6    | very light   | rather heavy | rather heavy | heavy        | 77      | 55      | 87      | Information Statement | Watch         | Cancellation  |
|     | 8/13/2023   | 0       | 42      | -       | 65.2    | no_rainfall  | rather heavy | -            | heavy        | -       | 147     | 172     | -                     | Advisory      | Advisory      |
|     | 8/14/2023   | 3.8     | 170.4   | -       | 165.8   | light        | very heavy   | -            | very heavy   | -       | 147     | 172     | -                     | Advisory      | Advisory      |
|     | 8/18/2023   | 53.6    | 66.2    | -       | 78      | rather heavy | heavy        | -            | heavy        | -       | 92      | 123     | -                     | Advisory      | Cancellation  |
|     | 8/21/2023   | 106.8   | 167.6   | -       | 242.2   | heavy        | very heavy   | -            | very heavy   | -       | 113     | 170     | -                     | Advisory      | Advisory      |

Spatial variability of rainfall

The cumulative plot of monthly observed rainfall across different rain gauges illustrates significant variation in rainfall distribution within the watershed over the course of a year. Despite the small size of the watershed, noticeable monthly differences highlight the spatial variability in precipitation patterns.

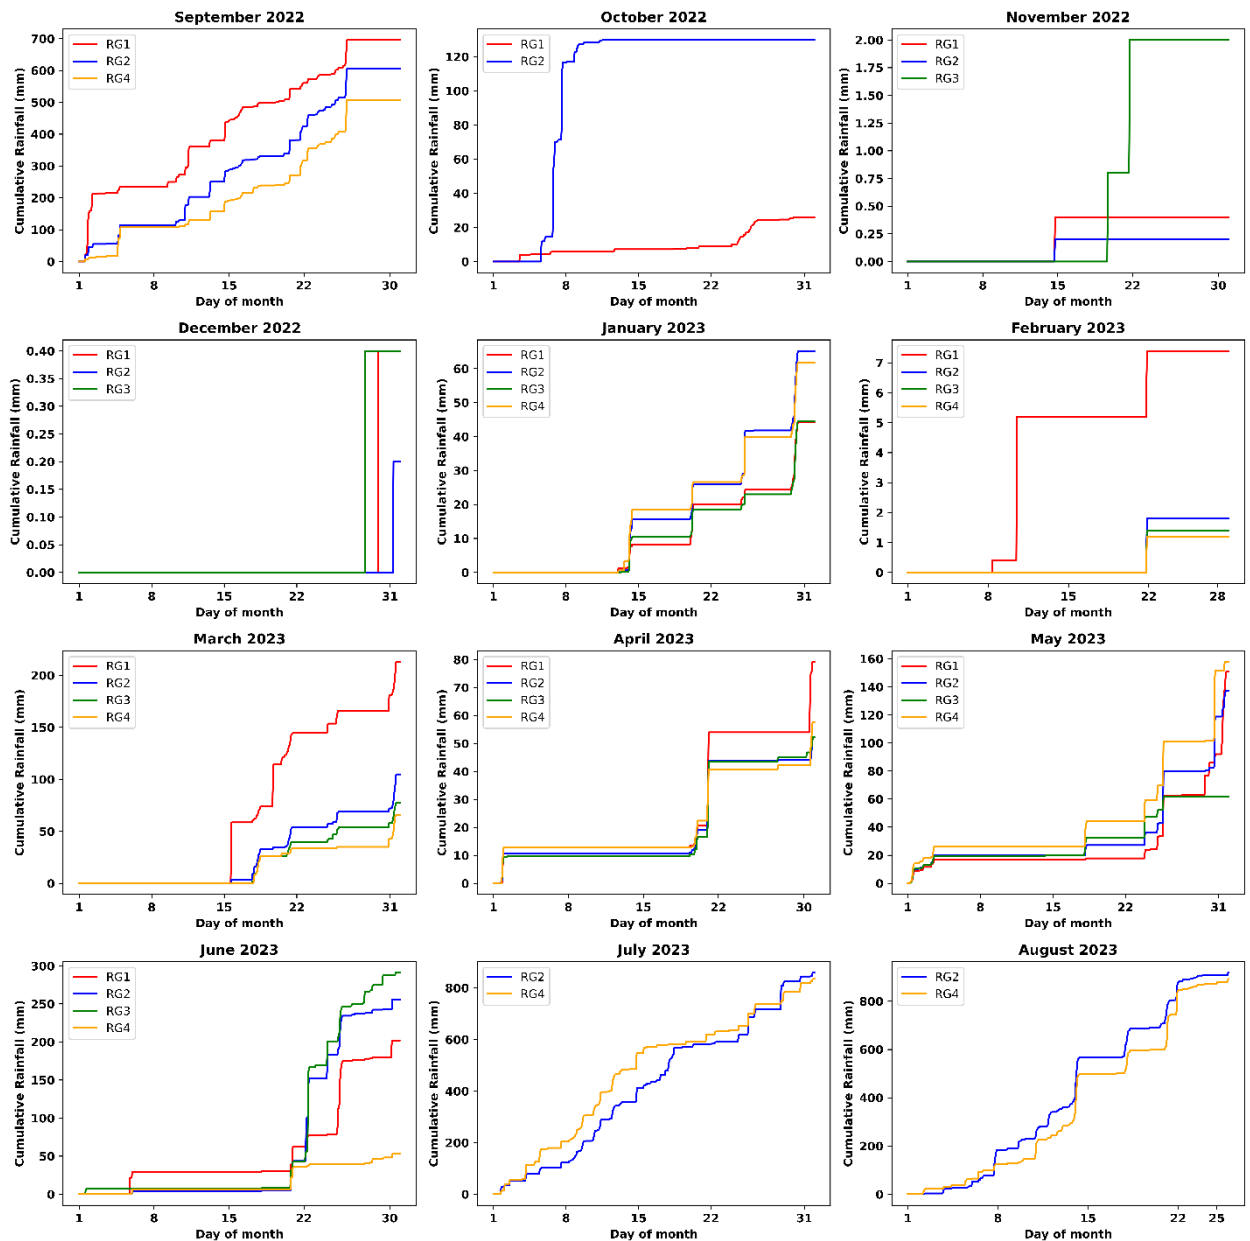

Figure S1: Cumulative plot of monthly observed rainfall in different rain gauges across the watershed.

35 **Community interaction**

The following are the key findings from the PRA exercise, which help provide an overall idea of the flood situation.

- ✓ The level of water in the river increases in rainy season (July-Sept) to 10-15 feet else it remains up to 0.5-1 feet only throughout the year.
- ✓ The water quality of Bindal only improves after heavy rainfall for a few days, but it again becomes dirty in the next week.
- ✓ It was found that the waste from all localities was disposed of directly into the river by people and through sewer lines.
- ✓ From the past 3-4 years, the intensity of the flood has increased with every rainfall.
- ✓ The damage caused by the flood was mostly due to bank erosion, and it affected the people living in non/semi-concrete houses compared to those living in concrete houses. No/less damage was recorded in the localities with all concrete houses near the riverbank.
- ✓ In all three stretches, the people who are mostly affected by the flood are from the labor class or low-wage workers. The flood had damaged some parts of their houses, carried away their assets (bicycle, television, documents, etc.), livestock or a family member.
- ✓ Through FGDs, it was observed that people were unable to suggest new ideas about early warning systems since they were less educated and also not able to understand the need to install them in their locality.
- ✓ According to the people, the amount of rainfall today has reduced as compared to 30-40 years ago when there were more trees, forests, and rivers.

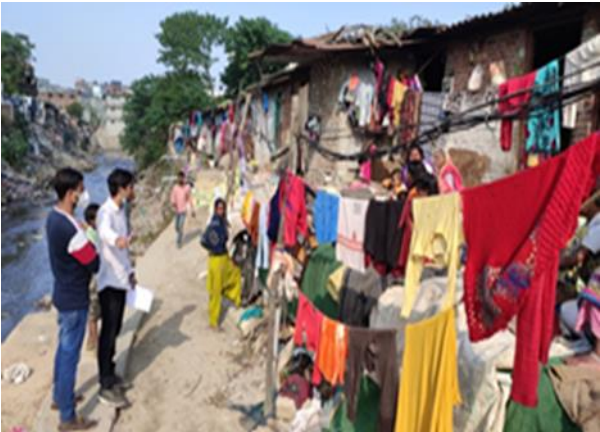

Figure S2: Field team conducting a household survey in the study area

Community involvement plays an important role in gaining insights into the varied impacts of floods across different segments of society. By engaging with the community, researchers can discern the specific classes of people most affected by flooding, whether they are marginalized groups, urban residents, or rural communities. Furthermore, community engagement facilitates an understanding of the diverse perspectives held by individuals and communities regarding flood events, including their perceptions, concerns, and experiences.

70 **Summary of Household surveys**

**Sample Size:** 100 Households in 5 critical localities.  
**Respondents:** Male 46%; Female 54%  
**Origin:** From Uttarakhand :31%; Outside Uttarakhand: 69%

| Livelihoods of Respondents | Major Problems identified | Major Impacts identified |
|----------------------------|---------------------------|--------------------------|
|----------------------------|---------------------------|--------------------------|

|                                                                                                             |                                                                                                                                         |                                                                                                                                                                                                                                                                                                                                                                                                                                                                                                                                                                    |
|-------------------------------------------------------------------------------------------------------------|-----------------------------------------------------------------------------------------------------------------------------------------|--------------------------------------------------------------------------------------------------------------------------------------------------------------------------------------------------------------------------------------------------------------------------------------------------------------------------------------------------------------------------------------------------------------------------------------------------------------------------------------------------------------------------------------------------------------------|
| 1) Private/Government Job<br>- 9%<br>2) Artisanal Activity 11%<br>3) Small Business – 24%<br>4) Labour -56% | 1) Increase in<br>Settlements – 32%<br>2) River has narrowed -<br>14%<br>3) Polluted river 17%<br>4) Intensification of floods<br>– 70% | <u>Impacts on Livelihoods:</u> Yes 29%; No 71%<br><u>Damages of common property:</u> Retaining<br>Wall (6%); Bank/Soil Erosion (6%); Mobile<br>Towers/Electric Pole (6%); Bridges (3%)<br><u>Loss of Private Property:</u> <ul style="list-style-type: none"> <li>• Damaged Clothes (52%)</li> <li>• Loss of Utensils (52%)</li> <li>• Loss of ration (29%)</li> <li>• Damaged Houses and Toilets (22%)</li> <li>• Damaged Furniture (10%)</li> <li>• Building Materials (1%)</li> <li>• Refrigerator, Cooler, Cycle (1%)</li> <li>• Not Affected (36%)</li> </ul> |
|-------------------------------------------------------------------------------------------------------------|-----------------------------------------------------------------------------------------------------------------------------------------|--------------------------------------------------------------------------------------------------------------------------------------------------------------------------------------------------------------------------------------------------------------------------------------------------------------------------------------------------------------------------------------------------------------------------------------------------------------------------------------------------------------------------------------------------------------------|

75
